# Supplementary material for: Phase-controlled synthesis of polymorphic MnO2 structures for electrochemical energy storage
Source: Royal Society of Chemistry journal article supplement (doi:10.1039/c4ta06943a), 2015-01-01

**Phase Controlled Synthesis of Polymorphic MnO<sub>2</sub> Structures for  
Electrochemical Energy Storage**

Bosi Yin, Siwen Zhang, He Jiang, Fengyu Qu, Xiang Wu\*

Key Laboratory for Photonic and Electronic Bandgap Materials, Ministry of

Education, Harbin Normal University, Harbin 150025, P. R. China

To whom correspondences should be addressed: E-mail: [wuxiang05@gmail.com](mailto:wuxiang05@gmail.com)

Fig.S1 K<sup>+</sup> controlled experiments. (a-c) SEM images of the products at different experiment parameters. (d) XRD pattern of the as-synthesized MnO<sub>2</sub> products.

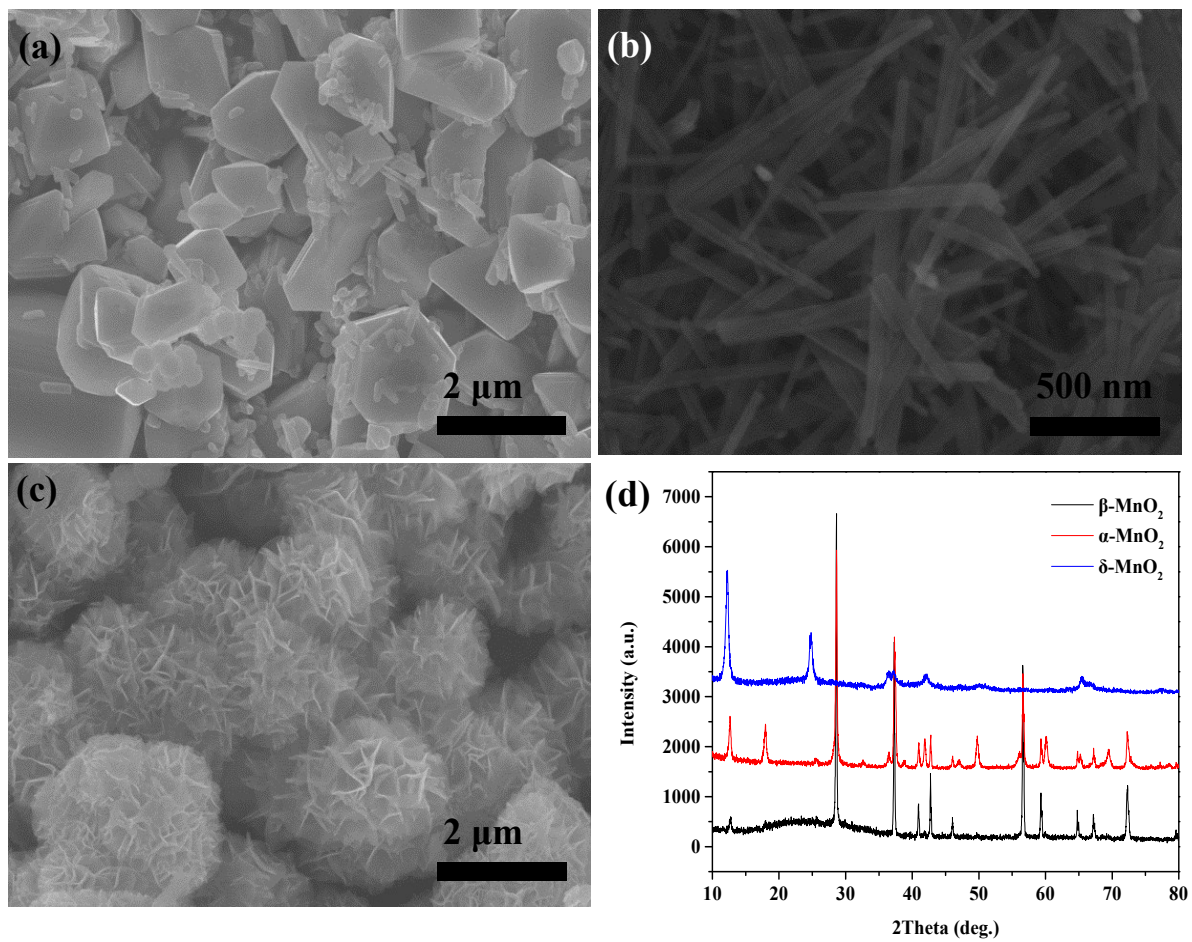

Fig.S2 H<sup>+</sup> controlled experiments. (a-c) SEM images of the products at different experiment parameters. (d) XRD pattern of the as-synthesized MnO<sub>2</sub> products.

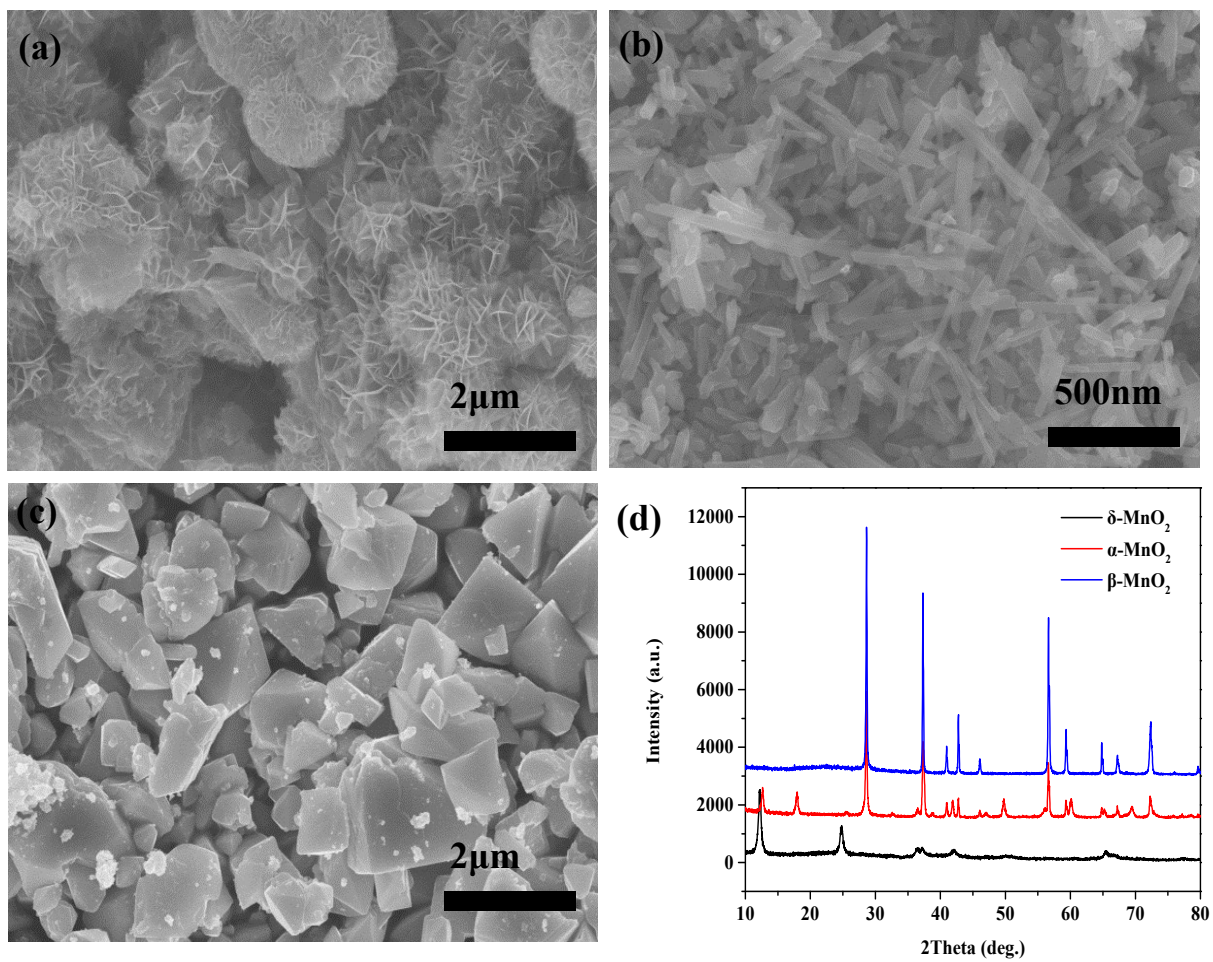

Fig.S3 The experiments of anion effects on the type of the final product. (a)  $\text{HNO}_3$  (b)  $\text{HCl}$  (c)  $\text{H}_2\text{SO}_4$  (d) XRD pattern of the as-synthesized  $\text{MnO}_2$  products.

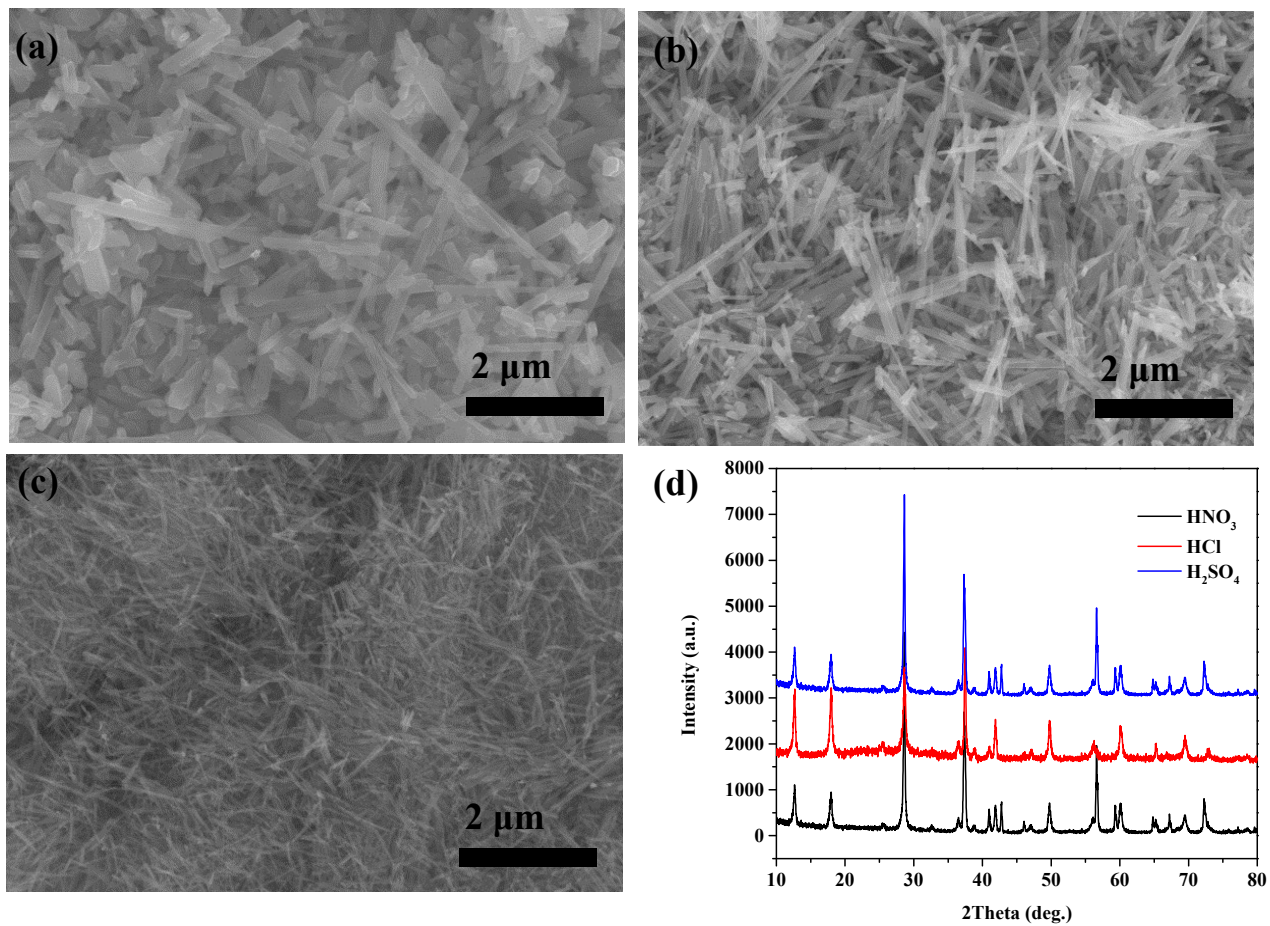

Fig.S4 CV curves of pure nickel foam and  $\alpha$ -,  $\beta$ - and  $\delta$ -MnO<sub>2</sub> electrodes at a scan rate of 100 mV·s<sup>-1</sup>

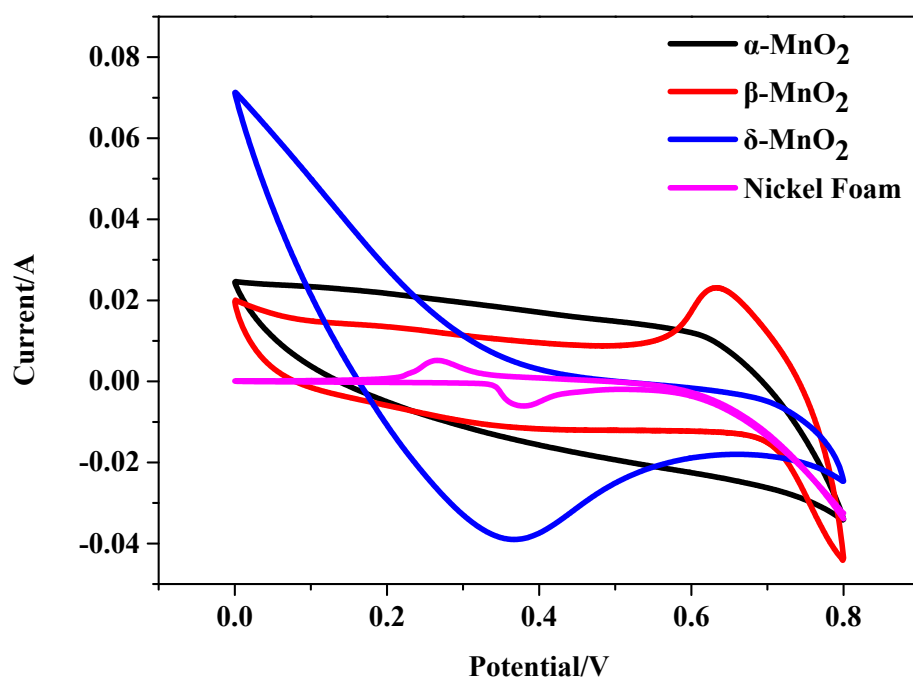

Supplement: c4ta06943a1.pdf [file c4ta06943a1.pdf]
